# Supplementary material for: Deep learning survival model for colorectal cancer patients (DeepCRC) with Asian clinical data compared with different theories
Source: PubMed Central journal article supplement — Arch Med Sci. 2023 Jan 13;19(1):264–9. doi: 10.5114/aoms/156477 (PMC9897076; doi:10.5114/aoms/156477), 2023-01-13
Supplement: AMS-19-1-156477-s1.pdf [file AMS-19-1-156477-s1.pdf]

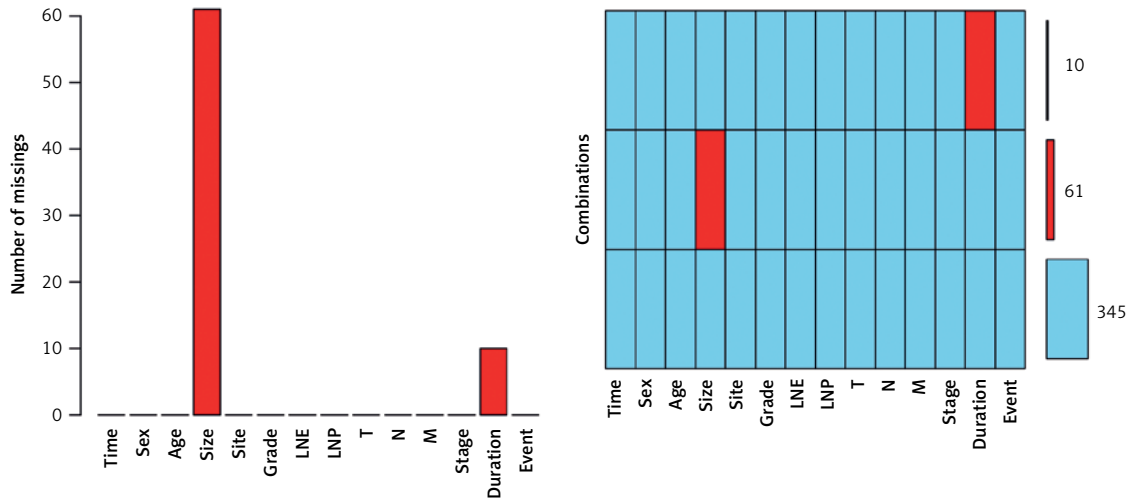

**Supplementary Figure S1.** Distribution of missing values of all patients  
*LNE – number of lymph nodes examined, LNP – number of lymph nodes positive.*

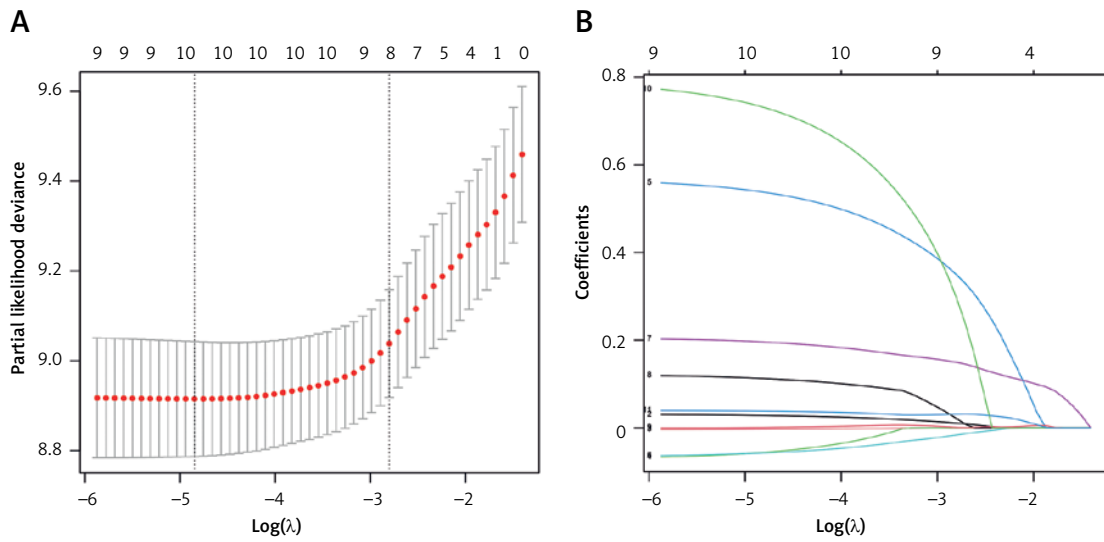

**Supplementary Figure S2.** Least Absolute Shrinkage and Selection Operator (LASSO) Cox regression was used to filter clinical features. **A** – Search for the right number of predictor variables and  $\lambda$  value. **B** – LASSO coefficient profiles of clinical features

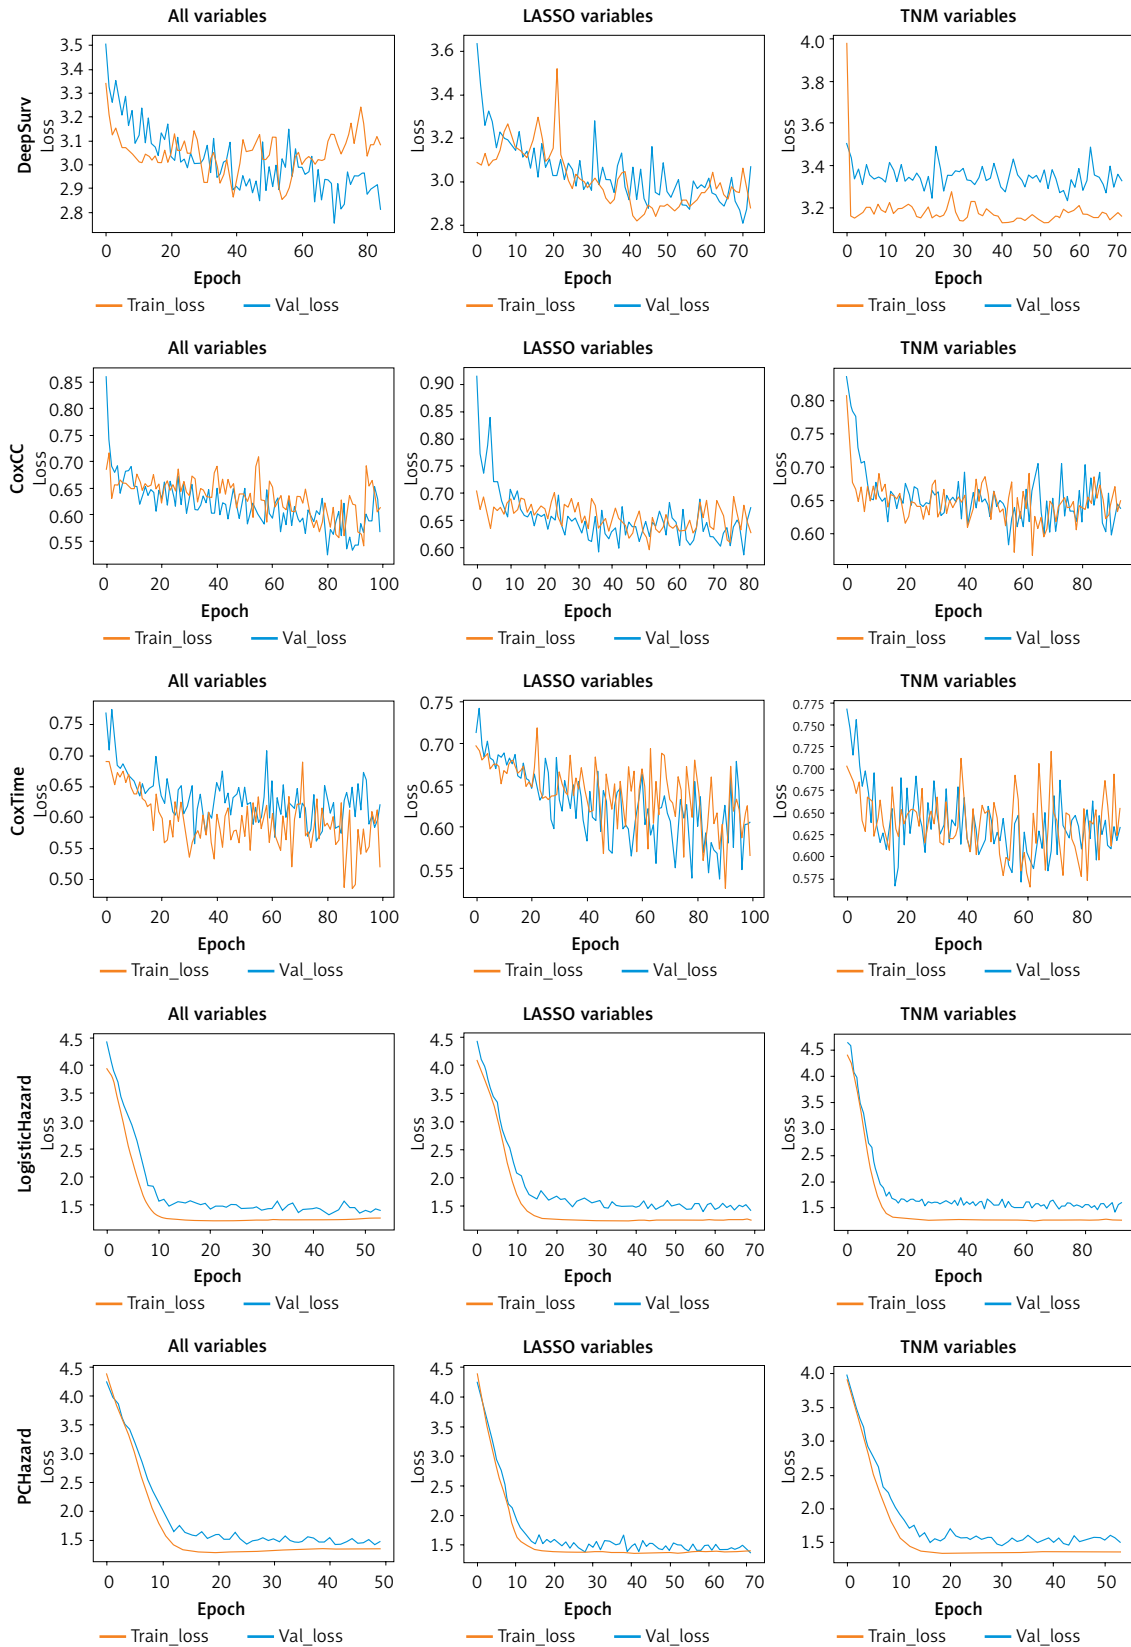

**Supplementary Figure S3.** Training curves of 8 neural network survival models with callback function to enable stopping trains automatically

CoxCC – Cox case-control corresponding methods. PCHazard – Piecewise Constant Hazard. N-MTLR – Neural Multi-Task Logistic Regression. PMF – Probability Mass Function. LASSO – Least Absolute Shrinkage and Selection Operator.

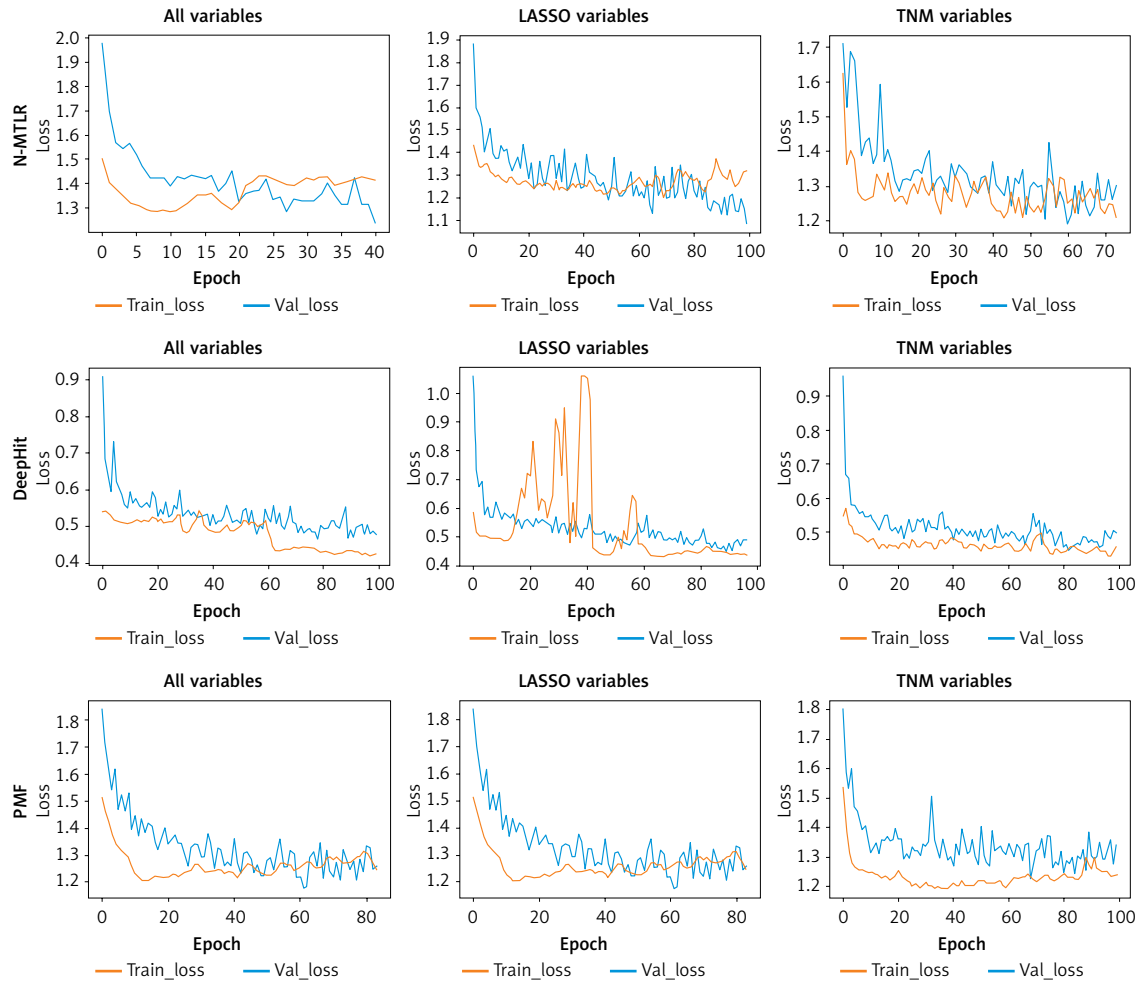

**Supplementary Figure S3. Cont.**

*CoxCC – Cox case-control corresponding methods. PCHazard – Piecewise Constant Hazard. N-MTLR – Neural Multi-Task Logistic Regression. PMF – Probability Mass Function. LASSO – Least Absolute Shrinkage and Selection Operator.*

**Supplementary Table SI.** Coefficients of variables in LASSO Cox regression

| Variable             | Coefficient |
|----------------------|-------------|
| Sex                  | 0.000       |
| Age                  | 0.028       |
| Size                 | -0.003      |
| Site                 | -0.057      |
| Grade                | 0.539       |
| Lymph nodes examined | -0.058      |
| Lymph nodes positive | 0.196       |
| T                    | 0.113       |
| N                    | 0.001       |
| M                    | 0.734       |
| Stage                | 0.038       |

*LASSO – Least Absolute Shrinkage and Selection Operator.*

**Supplementary Table SII.** C-index 95% confidence interval from 1000 times bootstrap of different deep learning survival models

| Models          | TNM variables       |        |                     |        |                     |        | LASSO variables     |        |                     |        |                     |        | All variables       |        |                     |        |        |        |
|-----------------|---------------------|--------|---------------------|--------|---------------------|--------|---------------------|--------|---------------------|--------|---------------------|--------|---------------------|--------|---------------------|--------|--------|--------|
|                 | Internal validation |        | External validation |        | Internal validation |        | External validation |        | Internal validation |        | External validation |        | Internal validation |        | External validation |        |        |        |
|                 | Mean                | High   | Low                 | High   |        |        |
| DeepSurv        | 0.6950              | 0.6925 | 0.6975              | 0.6660 | 0.6630              | 0.6691 | 0.8256              | 0.8240 | 0.8272              | 0.7543 | 0.7517              | 0.7568 | 0.8315              | 0.8297 | 0.8332              | 0.7719 | 0.7693 | 0.7745 |
| CoxCC           | 0.6677              | 0.6652 | 0.6702              | 0.6785 | 0.6758              | 0.6813 | 0.7090              | 0.7067 | 0.7114              | 0.6847 | 0.6818              | 0.6876 | 0.7554              | 0.7533 | 0.7575              | 0.6985 | 0.6957 | 0.7012 |
| CoxTime         | 0.6716              | 0.6692 | 0.6743              | 0.6720 | 0.6692              | 0.6748 | 0.7333              | 0.7311 | 0.7355              | 0.6995 | 0.6968              | 0.7022 | 0.7430              | 0.7409 | 0.7451              | 0.7193 | 0.7165 | 0.7220 |
| Logistic-Hazard | 0.6766              | 0.6743 | 0.6789              | 0.6665 | 0.6639              | 0.6691 | 0.7217              | 0.7196 | 0.7237              | 0.6866 | 0.6840              | 0.6892 | 0.7320              | 0.7301 | 0.7340              | 0.7055 | 0.7030 | 0.7080 |
| PCHazard        | 0.5494              | 0.5489 | 0.5500              | 0.5358 | 0.5354              | 0.5363 | 0.5495              | 0.5489 | 0.5501              | 0.5353 | 0.5349              | 0.5358 | 0.5499              | 0.5493 | 0.5504              | 0.5357 | 0.5353 | 0.5362 |
| N-MTLR          | 0.5430              | 0.5403 | 0.5458              | 0.5551 | 0.5521              | 0.5580 | 0.5230              | 0.5204 | 0.5254              | 0.6070 | 0.6041              | 0.6098 | 0.5271              | 0.5243 | 0.5298              | 0.6430 | 0.6400 | 0.6459 |
| DeepHit         | 0.4783              | 0.4756 | 0.4811              | 0.4133 | 0.4105              | 0.4162 | 0.6306              | 0.6282 | 0.6330              | 0.6788 | 0.6759              | 0.6818 | 0.6890              | 0.6868 | 0.6913              | 0.6493 | 0.6466 | 0.6521 |
| PMF             | 0.5181              | 0.5154 | 0.5208              | 0.5233 | 0.5198              | 0.5269 | 0.5451              | 0.5424 | 0.5477              | 0.5832 | 0.5804              | 0.5860 | 0.6251              | 0.6227 | 0.6275              | 0.5857 | 0.5828 | 0.5885 |
| Cox             | 0.6717              | 0.6692 | 0.6742              | 0.6710 | 0.6681              | 0.6738 | 0.7343              | 0.7321 | 0.7365              | 0.6632 | 0.6602              | 0.6662 | 0.7354              | 0.7332 | 0.7376              | 0.6638 | 0.6608 | 0.6669 |

C-index, concordance index. Mean – mean C-index. Low – low C-index 95% confidence. High – high C-index 95% confidence. TNM variables: T + N + M + Stage. LASSO variables: Age + Size + Site + Grade + Lymph nodes examined + Lymph nodes positive + T + N + M + Stage. All variables: Sex + Age + Size + Site + Grade + Lymph nodes examined + Lymph nodes positive + T + N + M + Stage. LASSO – Least Absolute Shrinkage and Selection Operator. CoxCC – Cox Case-Control Corresponding Methods. PCHazard – Piecewise Constant Hazard. N-MTLR, Neural Multi-Task Logistic Regression. PMF – Probability Mass Function.

**Additional Table S1.** Clinical data of patients in two cohorts

| Sex    | Age | Size | Site                  | Grade | Lymph nodes examined | Lymph nodes positive | T   | N   | M   | Stage | Duration | Event |
|--------|-----|------|-----------------------|-------|----------------------|----------------------|-----|-----|-----|-------|----------|-------|
| Male   | 54  | 50   | Ascending colon       | II    | 11                   | 0                    | T3  | N0  | M0  | II    | 51       | 0     |
| Female | 74  | 30   | Rectum                | II    | 7                    | 0                    | T2  | N0  | M0  | I     | 60       | 1     |
| Male   | 63  | 70   | Rectum                | III   | 6                    | 0                    | T3  | N0  | M0  | IIA   | 90       | 0     |
| Female | 68  | 50   | Rectum                | II    | 4                    | 0                    | T2  | N0  | M0  | I     | 90       | 0     |
| Male   | 57  | 20   | Rectum                | II    | 2                    | 0                    | T1  | N0  | M0  | I     | 98       | 0     |
| Female | 55  | 70   | Ascending colon       | III   | 25                   | 0                    | T4a | N0  | M0  | II    | 49       | 0     |
| Female | 79  | 55   | Rectum                | III   | 7                    | 1                    | T3  | N1a | M1a | IVA   | 31       | 1     |
| Female | 67  | 50   | Rectum                | III   | 7                    | 1                    | T4a | N1a | M0  | IIIB  | 89       | 0     |
| Female | 72  | 40   | Rectum                | II    | 4                    | 0                    | T3  | N0  | M0  | IIA   | 68       | 1     |
| Female | 78  | 12   | Rectum                | III   | 5                    | 2                    | T3  | N1b | M0  | IIIB  | 36       | 1     |
| Female | 66  | 50   | Rectum                | II    | 1                    | 0                    | T3  | N0  | M0  | IIA   | 85       | 0     |
| Male   | 80  | 95   | Rectum                | III   | 5                    | 0                    | T3  | N0  | M0  | IIA   | 27       | 1     |
| Female | 60  | 60   | Rectum                | II    | 2                    | 2                    | T3  | N1b | M0  | IIIB  | 7        | 1     |
| Female | 51  | 60   | Rectosigmoid junction | II    | 6                    | 3                    | T4a | N1b | M0  | IIIB  | 92       | 0     |
| Male   | 78  | 35   | Sigmoid colon         | II    | 15                   | 3                    | T4a | N1  | M0  | III   | 60       | 0     |
| Female | 78  | 80   | Rectum                | II    | 2                    | 0                    | T3  | N0  | M0  | IIA   | 48       | 1     |
| Female | 56  | 65   | Rectum                | II    | 4                    | 1                    | T3  | N1a | M0  | IIIB  | 93       | 0     |
| Female | 73  | 70   | Ascending colon       | III   | 23                   | 2                    | T4a | N1  | M0  | III   | 18       | 1     |
| Male   | 79  | 70   | Hepatic flexure       | II    | 30                   | 2                    | T3  | N1  | M0  | III   | 77       | 0     |
| Female | 59  | 50   | Rectum                | III   | 2                    | 0                    | T3  | N0  | M0  | IIA   | 99       | 1     |
| Male   | 74  | 80   | Rectum                | II    | 13                   | 0                    | T3  | N0  | M0  | IIA   | 68       | 1     |
| Female | 75  | 40   | Rectum                | III   | 6                    | 1                    | T3  | N1a | M0  | IIIB  | 85       | 0     |
| Male   | 67  | 80   | Rectum                | II    | 15                   | 2                    | T3  | N1b | M0  | IIIB  | 92       | 0     |
| Male   | 36  | 4    | Rectum                | II    | 1                    | 0                    | T2  | N0  | M0  | I     | 95       | 0     |
| Male   | 58  | 35   | Ascending colon       | II    | 11                   | 0                    | T2  | N0  | M0  | I     | 55       | 0     |
| Male   | 46  | 45   | Rectum                | II    | 2                    | 0                    | T2  | N0  | M0  | I     | 86       | 0     |
| Male   | 46  | 70   | Descending colon      | II    | 75                   | 1                    | T4b | N1  | M0  | III   | 22       | 1     |
| Female | 78  | 50   | Large intestine, NOS  | II    | 12                   | 1                    | T4a | N1  | M0  | III   | 54       | 0     |
| Female | 67  | 40   | Rectum                | II    | 5                    | 0                    | T2  | N0  | M0  | I     | 89       | 0     |
| Female | 76  | 40   | Large intestine, NOS  | III   | 24                   | 24                   | T3  | N2  | M0  | III   | 50       | 0     |
| Male   | 48  | 30   | Rectum                | II    | 6                    | 0                    | T3  | N0  | M0  | IIA   | 104      | 0     |
| Female | 59  | 50   | Ileocecal junction    | II    | 19                   | 0                    | T4b | N0  | M0  | IIC   | 12       | 1     |
| Male   | 73  | 80   | Rectum                | III   | 11                   | 0                    | T3  | N1c | M0  | IIIB  | 14       | 1     |
| Male   | 76  | 50   | Sigmoid colon         | III   | 18                   | 17                   | T4b | N2b | M0  | IIIC  | 9        | 1     |

Additional Table SI. Cont.

| Sex    | Age | Size | Site                  | Grade | Lymph nodes examined | Lymph nodes positive | T   | N   | M  | Stage | Duration | Event |
|--------|-----|------|-----------------------|-------|----------------------|----------------------|-----|-----|----|-------|----------|-------|
| Male   | 72  | 53   | Large intestine, NOS  | II    | 21                   | 0                    | T3  | N0  | M0 | II    | 28       | 1     |
| Male   | 61  | 55   | Sigmoid colon         | II    | 28                   | 0                    | T4a | N0  | M0 | II    | 52       | 0     |
| Male   | 72  | 55   | Rectum                | II    | 4                    | 0                    | T3  | N0  | M0 | IIA   | 1        | 1     |
| Male   | 66  | 50   | Rectum                | II    | 13                   | 3                    | T3  | N1b | M0 | IIIB  | 48       | 1     |
| Female | 71  | 70   | Rectum                | II    | 13                   | 0                    | T3  | N0  | M0 | IIA   | 50       | 1     |
| Female | 57  | 70   | Ascending colon       | II    | 16                   | 2                    | T4b | N1  | M1 | IV    | 2        | 1     |
| Female | 78  | 30   | Sigmoid colon         | II    | 16                   | 0                    | T3  | N0  | M0 | II    | 59       | 0     |
| Male   | 62  | 23   | Rectosigmoid junction | III   | 28                   | 0                    | T4a | N0  | M0 | II    | 55       | 0     |
| Male   | 50  | 55   | Rectum                | II    | 7                    | 0                    | T3  | N0  | M0 | IIA   | 99       | 0     |
| Female | 73  | 40   | Rectum                | III   | 3                    | 1                    | T3  | N1a | M0 | IIIB  | 104      | 0     |
| Male   | 50  | 50   | Rectum                | II    | 7                    | 0                    | T3  | N0  | M0 | IIA   | 85       | 0     |
| Male   | 90  | 55   | Rectum                | II    | 1                    | 0                    | T3  | N0  | M0 | IIA   | 98       | 0     |
| Female | 52  | 45   | Rectum                | II    | 13                   | 0                    | T3  | N0  | M0 | IIA   | 89       | 0     |
| Male   | 78  | 60   | Ileocecal junction    | II    | 17                   | 0                    | T3  | N0  | M0 | II    | 47       | 1     |
| Male   | 66  | 110  | Descending colon      | II    | 10                   | 0                    | T4b | N0  | M0 | IIC   | 110      | 0     |
| Male   | 53  | 40   | Rectum                | II    | 9                    | 0                    | T3  | N0  | M0 | IIA   | 94       | 0     |
| Male   | 49  | 120  | Rectum                | II    | 13                   | 0                    | T3  | N0  | M0 | IIA   | 85       | 0     |
| Female | 80  | 45   | Ascending colon       | II    | 11                   | 0                    | T3  | N0  | M0 | II    | 65       | 0     |
| Male   | 71  | 40   | Rectum                | II    | 4                    | 0                    | T3  | N0  | M0 | IIA   | 89       | 0     |
| Male   | 51  | 55   | Sigmoid colon         | II    | 18                   | 0                    | T4a | N0  | M0 | II    | 59       | 0     |
| Male   | 55  | 50   | Transverse colon      | III   | 18                   | 0                    | T4a | N0  | M0 | IIB   | 86       | 0     |
| Female | 61  | 35   | Rectum                | III   | 2                    | 1                    | T3  | N1a | M0 | IIC   | 19       | 1     |
| Female | 71  | 65   | Ascending colon       | II    | 31                   | 0                    | T3  | N0  | M0 | II    | 52       | 0     |
| Female | 74  | 70   | Sigmoid colon         | II    | 22                   | 8                    | T3  | N2  | M0 | III   | 60       | 0     |
| Male   | 83  | 45   | Rectum                | II    | 2                    | 1                    | T3  | N1a | M0 | IIIB  | 33       | 1     |
| Male   | 49  | 50   | Rectum                | II    | 3                    | 2                    | T3  | N1b | M0 | IIIB  | 17       | 1     |
| Male   | 79  | 60   | large intestine, NOS  | II    | 10                   | 2                    | T4a | N1b | M0 | IIIB  | 11       | 1     |
| Female | 63  | 50   | Rectum                | II    | 8                    | 4                    | T3  | N2a | M0 | IIIB  | 99       | 0     |
| Female | 37  | 60   | Rectum                | II    | 6                    | 0                    | T3  | N0  | M0 | IIA   | 84       | 0     |
| Male   | 80  | 38   | Rectum                | II    | 4                    | 0                    | T3  | N0  | M0 | IIA   | 98       | 0     |
| Male   | 76  | 20   | Rectum                | III   | 2                    | 0                    | T3  | N0  | M0 | IIA   | 26       | 1     |
| Male   | 72  | 80   | Rectum                | III   | 6                    | 0                    | T3  | N0  | M0 | IIA   | 105      | 0     |
| Male   | 57  | 45   | Ascending colon       | II    | 17                   | 0                    | T3  | N0  | M0 | II    | 60       | 0     |

Additional Table SI. Cont.

| Sex    | Age | Size | Site                 | Grade | Lymph nodes examined | Lymph nodes positive | T   | N   | M  | Stage | Duration | Event |
|--------|-----|------|----------------------|-------|----------------------|----------------------|-----|-----|----|-------|----------|-------|
| Female | 85  | 55   | Sigmoid colon        | II    | 15                   | 2                    | T4a | N1b | M0 | IIIB  | 72       | 0     |
| Female | 79  | 60   | Rectum               | III   | 6                    | 5                    | T3  | N2a | M0 | IIIB  | 6        | 1     |
| Male   | 67  | 75   | Rectum               | II    | 6                    | 4                    | T3  | N2a | M0 | IIIB  | 90       | 0     |
| Male   | 63  | 50   | Rectum               | III   | 5                    | 0                    | T3  | N0  | M0 | IIA   | 86       | 0     |
| Female | 53  | 40   | Large intestine, NOS | II    | 0                    | 0                    | T4a | N0  | M0 | IIB   | 92       | 0     |
| Female | 61  | 35   | Rectum               | III   | 2                    | 1                    | T3  | N1a | M0 | IIIB  | 19       | 1     |
| Male   | 59  | 60   | Rectum               | II    | 4                    | 1                    | T3  | N1a | M0 | IIIB  | 90       | 0     |
| Female | 53  | 50   | Rectum               | II    | 5                    | 0                    | T3  | N0  | M0 | IIA   | 99       | 0     |
| Male   | 74  | 60   | Rectum               | II    | 10                   | 0                    | T3  | N0  | M0 | IIA   | 43       | 1     |
| Male   | 79  | 70   | Ascending colon      | II    | 18                   | 0                    | T3  | N0  | M0 | II    | 53       | 0     |
| Male   | 79  | 50   | Sigmoid colon        | II    | 7                    | 0                    | T4a | N0  | M0 | IIB   | 34       | 1     |
| Female | 59  | 50   | Rectum               | II    | 9                    | 3                    | T3  | N1b | M0 | IIIB  | 108      | 0     |
| Female | 51  | 100  | Rectum               | II    | 4                    | 0                    | T3  | N0  | M0 | IIA   | 103      | 0     |
| Male   | 54  | 60   | Rectum               | II    | 11                   | 1                    | T3  | N1a | M0 | IIIB  | 23       | 1     |
| Male   | 54  | 100  | Rectum               | III   | 6                    | 0                    | T3  | N0  | M0 | IIA   | 86       | 0     |
| Male   | 56  | 90   | Rectum               | III   | 6                    | 0                    | T3  | N0  | M0 | IIA   | 90       | 0     |
